# Supplementary material for: Embryogenic potential and expression of embryogenesis-related genes in conifers are affected by treatment with a histone deacetylase inhibitor
Source: PubMed Central journal article supplement — Planta. 2011 May 4;234(3):527–39. doi: 10.1007/s00425-011-1418-8 (PMC3162143; doi:10.1007/s00425-011-1418-8), 2011-05-04
Supplement: 425_2011_1418_MOESM2_ESM.pdf [file 425_2011_1418_MOESM2_ESM.pdf]

**Supplementary Table 1** Primer sequences used for isolation of *PaHAP3a* and *PsHAP3a* (5' to 3' orientation)

| Gene           | Primer name                             | Forward primer           | Reverse primer           | Accession # for primer design |
|----------------|-----------------------------------------|--------------------------|--------------------------|-------------------------------|
| <i>PaHAP3A</i> | <i>PgLEC1-2</i>                         | GCTTCTCCTTCTCCTTCTCC     | AACCCTAGAAAAAGAAAATCGTG  | DR553864.1, DR548381.1        |
|                | <i>PgLEC1-3</i>                         | CCAGTTGGCTTCTTTATACCC    | GAAAATCGTGCCACCAGTC      | DR553864.1, DR548381.1        |
| <i>PsHAP3A</i> | <i>LEC-1 FW1, LEC-1 RV-2010</i>         | AGCTCGATCTTCGGTCTTCA     | TCAGATGGGTCATCCTCCTC     | DT627043, AW754604            |
| <i>PaHAP3B</i> | <i>PtLL1</i>                            | AGCAAGCACAGTCAACCGGTAAGC | ATGGCCCATAAAACATCCTCGGCA | AW981720                      |
| <i>PsHAP3B</i> | <i>PtLL1</i>                            | AGCAAGCACAGTCAACCGGTAAGC | ATGGCCCATAAAACATCCTCGGCA | AW981720                      |
| <i>PsVP1</i>   | <i>VP-1 FW-1 abies, VP-1 RW-3 taeda</i> | TTCTGCAGCCCCAGCCACAT     | ACACCCTTGCAGCATCTTCT     | <i>PaVP1</i> , DT628429.1     |
