# Supplementary material for: Embryogenic potential and expression of embryogenesis-related genes in conifers are affected by treatment with a histone deacetylase inhibitor
Source: PubMed Central journal article supplement — Planta. 2011 May 4;234(3):527–39. doi: 10.1007/s00425-011-1418-8 (PMC3162143; doi:10.1007/s00425-011-1418-8), 2011-05-04
Supplement: 425_2011_1418_MOESM3_ESM.pdf [file 425_2011_1418_MOESM3_ESM.pdf]

**Supplementary Table 2** Species, genes, locus, names, accession numbers and references used in the HAP3 phylogeny.

| Species                           | other name | Accession # / loci            | Reference                                                               |
|-----------------------------------|------------|-------------------------------|-------------------------------------------------------------------------|
| <i>Homo sapiens</i>               | HsNFYB     | NM_006166                     | <a href="http://www.ncbi.nlm.nih.gov/">http://www.ncbi.nlm.nih.gov/</a> |
| <i>Rattus norvegicus</i>          | RnNFYB     | NM_031553                     | <a href="http://www.ncbi.nlm.nih.gov/">http://www.ncbi.nlm.nih.gov/</a> |
| <i>Zea mays</i>                   | ZmLEC1     | AF410176                      | Shen et al 2010                                                         |
| <i>Zea mays</i>                   | ZmNFYB6    | EU976517.1                    | Alexandrov et al 2009                                                   |
| <i>Oryza sativa</i>               | OsLEC1B    | Os02g0725700, AY062184.1      | Xia et al. 2008                                                         |
| <i>Oryza sativa</i>               | OsLEC1     | Os06g0285200, AY264284        | Xia et al. 2008                                                         |
| <i>Arabidopsis thaliana</i>       | AtLEC1     | AT1G21970.1, NM_102046        | Lee et al 2003                                                          |
| <i>Arabidopsis thaliana</i>       | AtL1L      | AT5G47670.1, NM_124141        | Kwong et al 2003                                                        |
| <i>Arabidopsis thaliana</i>       |            | AT4G14540.1                   | <a href="http://www.arabidopsis.org/">http://www.arabidopsis.org/</a>   |
| <i>Arabidopsis thaliana</i>       |            | AT2G13570.1                   | <a href="http://www.arabidopsis.org/">http://www.arabidopsis.org/</a>   |
| <i>Arabidopsis thaliana</i>       |            | AT1G09030.1                   | <a href="http://www.arabidopsis.org/">http://www.arabidopsis.org/</a>   |
| <i>Arabidopsis thaliana</i>       |            | AT2G47810.1                   | <a href="http://www.arabidopsis.org/">http://www.arabidopsis.org/</a>   |
| <i>Arabidopsis thaliana</i>       |            | AT5G47640.1                   | <a href="http://www.arabidopsis.org/">http://www.arabidopsis.org/</a>   |
| <i>Arabidopsis thaliana</i>       |            | AT2G38880.2                   | <a href="http://www.arabidopsis.org/">http://www.arabidopsis.org/</a>   |
| <i>Arabidopsis thaliana</i>       |            | AT2G37060.1                   | <a href="http://www.arabidopsis.org/">http://www.arabidopsis.org/</a>   |
| <i>Arabidopsis thaliana</i>       |            | AT3G53340.1                   | <a href="http://www.arabidopsis.org/">http://www.arabidopsis.org/</a>   |
| <i>Pinus taeda</i>                | PtHAP3A    | PUT-157a-Pinus_taeda-68442    | <a href="http://www.plantgdb.org/">http://www.plantgdb.org/</a>         |
| <i>Pinus taeda</i>                | PtHAP3B    | AW981720                      | <a href="http://www.ncbi.nlm.nih.gov/">http://www.ncbi.nlm.nih.gov/</a> |
| <i>Pinus taeda</i>                | PtHAPx     | PUT-157a-Pinus_taeda-81582554 | <a href="http://www.plantgdb.org/">http://www.plantgdb.org/</a>         |
| <i>Pinus sylvestris</i>           | PsHAP3A    | JF280794                      | This work                                                               |
| <i>Pinus sylvestris</i>           | PsHAP3B    | partial sequence              | This work                                                               |
| <i>Picea abies</i>                | PaHAP3A    | JF280795                      | This work                                                               |
| <i>Picea abies</i>                | PaHAP3B    | partial sequence              | This work                                                               |
| <i>Picea abies</i>                | PaHAP3x    | PUT-175a-Picea_abies-4645     | <a href="http://www.plantgdb.org/">http://www.plantgdb.org/</a>         |
| <i>Adiantum capillus-veneris</i>  | AcLEC1     | EF108291                      | Xia et al. 2008                                                         |
| <i>Selaginella moellendorffii</i> | SmLEC1     | EU019906, BK005972            | Xia et al. 2008                                                         |
| <i>Selaginella davidii</i>        | SdLEC1     | EF108295                      | Xia et al. 2008                                                         |
| <i>Selaginella sinensis</i>       | SsLEC1     | EF108296                      | Xia et al. 2008                                                         |
