# Supplementary material for: Embryogenic potential and expression of embryogenesis-related genes in conifers are affected by treatment with a histone deacetylase inhibitor
Source: PubMed Central journal article supplement — Planta. 2011 May 4;234(3):527–39. doi: 10.1007/s00425-011-1418-8 (PMC3162143; doi:10.1007/s00425-011-1418-8), 2011-05-04
Supplement: 425_2011_1418_MOESM4_ESM.pdf [file 425_2011_1418_MOESM4_ESM.pdf]

**Supplementary Table 3** Primer sequences used for qRT-PCR (5' to 3' orientation).

| <i>Gene</i>                    | Forward primer         | Reverse primer             | Reference                            |
|--------------------------------|------------------------|----------------------------|--------------------------------------|
| <i>EF1-<math>\alpha</math></i> | CACCTTGGGAGTGAAGCAAATG | GGGAGTAGTGGCATCCATCTTG     | Gyllenstrand, personal communication |
| <i>Phosphoglucomutase</i>      | AATGCAGTTGAAGCCATTCC   | CCAGTGCCGAAACTCTCTTC       | Vestman et al. 2010                  |
| <i>CDC2</i>                    | TCCGACGGGTGCAGAGAA     | GCTCCATTCAGCCTGATTCAA      | Wadenbäck et al. 2008                |
| <i>PaHAP3A</i>                 | CGGCATTCTCCAAATCATC    | TGTCGCAGGAATTAAGGAGA       | This work                            |
| <i>PaVP1</i>                   | CGCTGGTTTTACCAACCCTA   | ACAGTAAGCCTGCTGCTGGT       | This work                            |
| <i>PsHAP3A</i>                 | AGCTCGATCTTCGGTCTTCA   | TGCCAACTTCGGACATCATA       | This work                            |
| <i>PsVP1</i>                   | GTGCCAATTTGGTTAATGG    | GTG CCA TCA AAG ACA GCA GA | This work                            |
