# Supplementary material for: Embryogenic potential and expression of embryogenesis-related genes in conifers are affected by treatment with a histone deacetylase inhibitor
Source: PubMed Central journal article supplement — Planta. 2011 May 4;234(3):527–39. doi: 10.1007/s00425-011-1418-8 (PMC3162143; doi:10.1007/s00425-011-1418-8), 2011-05-04
Supplement: 425_2011_1418_MOESM5_ESM.pdf [file 425_2011_1418_MOESM5_ESM.pdf]

**Supplementary Table 4** Significant differences in expression levels of *PsHAP3A* (**a** and **c**) and *PsVP1* (**b** and **d**) during zygotic (**a** and **b**) and somatic (**c** and **d**) embryogenesis in Scots pine. The analyses are based on the values presented in Fig. 4 **b-e**

| <b>a</b>               |   | <b>PsHAP3A</b> |   |    |    |    |    |    |    | <b>b</b> |  | <b>PsVP1</b> |       |    |    |    |    |    |    |    |    |
|------------------------|---|----------------|---|----|----|----|----|----|----|----------|--|--------------|-------|----|----|----|----|----|----|----|----|
|                        |   | stage          | 1 | 2  | 3  | 4  | 5  | 6  | 7  | 8        |  |              | stage | 1  | 2  | 3  | 4  | 5  | 6  | 7  | 8  |
| <b>Zygotic embryos</b> | 1 |                |   | ns | ns | ** | ** | ** | ** | **       |  | 1            |       | ns | *  | *  | *  | ** | *  | *  | *  |
|                        | 2 |                |   |    | ns | ** | ** | ** | ** | **       |  | 2            |       |    | ns | ns | *  | *  | *  | *  | ns |
|                        | 3 |                |   |    |    | *  | ** | ** | ** | **       |  | 3            |       |    |    | ns | ns | ns | ns | ns | ns |
|                        | 4 |                |   |    |    |    | ns | ns | ns | ns       |  | 4            |       |    |    |    | ns | ns | ns | ns | ns |
|                        | 5 |                |   |    |    |    |    | ns | ns | ns       |  | 5            |       |    |    |    |    | ns | ns | ns | ns |
|                        | 6 |                |   |    |    |    |    |    | ns | ns       |  | 6            |       |    |    |    |    |    | ns | ns | ns |
|                        | 7 |                |   |    |    |    |    |    |    | ns       |  | 7            |       |    |    |    |    |    |    | ns | ns |
|                        | 8 |                |   |    |    |    |    |    |    |          |  | 8            |       |    |    |    |    |    |    |    | ns |
| <b>Somatic embryos</b> | 1 |                |   | *  | ** | ** | *  | *  | *  | ns       |  | 1            |       | ns | *  | *  | *  | *  | *  | *  | *  |
|                        | 2 |                |   |    | ns | ns | ns | ns | ns | ns       |  | 2            |       |    | ns |
|                        | 3 |                |   |    |    | ns | ns | ns | ns | ns       |  | 3            |       |    |    | ns | ns | ns | ns | ns | ns |
|                        | 4 |                |   |    |    |    | ns | ns | ns | ns       |  | 4            |       |    |    |    | ns | ns | ns | ns | ns |
|                        | 5 |                |   |    |    |    |    | ns | ns | ns       |  | 5            |       |    |    |    |    | ns | ns | ns | ns |
|                        | 6 |                |   |    |    |    |    |    | ns | ns       |  | 6            |       |    |    |    |    |    | ns | ns | ns |
|                        | 7 |                |   |    |    |    |    |    |    | ns       |  | 7            |       |    |    |    |    |    |    | ns | ns |
|                        | 8 |                |   |    |    |    |    |    |    |          |  | 8            |       |    |    |    |    |    |    |    | ns |

\* =  $P < 0.05$

\*\* =  $P < 0.001$

ns = not significant
